# Supplementary material for: Temperature-induced assembly of MOF polymorphs: Syntheses, structures and physical properties
Source: Royal Society of Chemistry journal article supplement (doi:10.1039/c1ce05369h), 2012-01-01
Supplement: c1ce05369h.pdf [file c1ce05369h.pdf]

# **Electronic Supplementary Information for:**

  

## **Temperature-induced assembly of supramolecular isomers: Syntheses, structures and physical properties**

**Guang-Xiang Liu<sup>\*a</sup>, Heng Xu<sup>a</sup>, Hong Zhou<sup>b</sup>, Sadafumi Nishihara<sup>c</sup> and Xiao-Ming Ren<sup>a</sup>**

<sup>a</sup> *School of Chemistry and Chemical Engineering, Anqing Normal University, Anqing 246003, China*

<sup>b</sup> *Department of Chemistry, Nanjing Xiaozhuang University, Nanjing 211171, China*

<sup>c</sup> *Department of Physical Science, Graduate School of Science, Osaka Prefecture University, Sakai, Osaka 599-8531, Japan*

*E-mail: njuliugx@gmail.com*

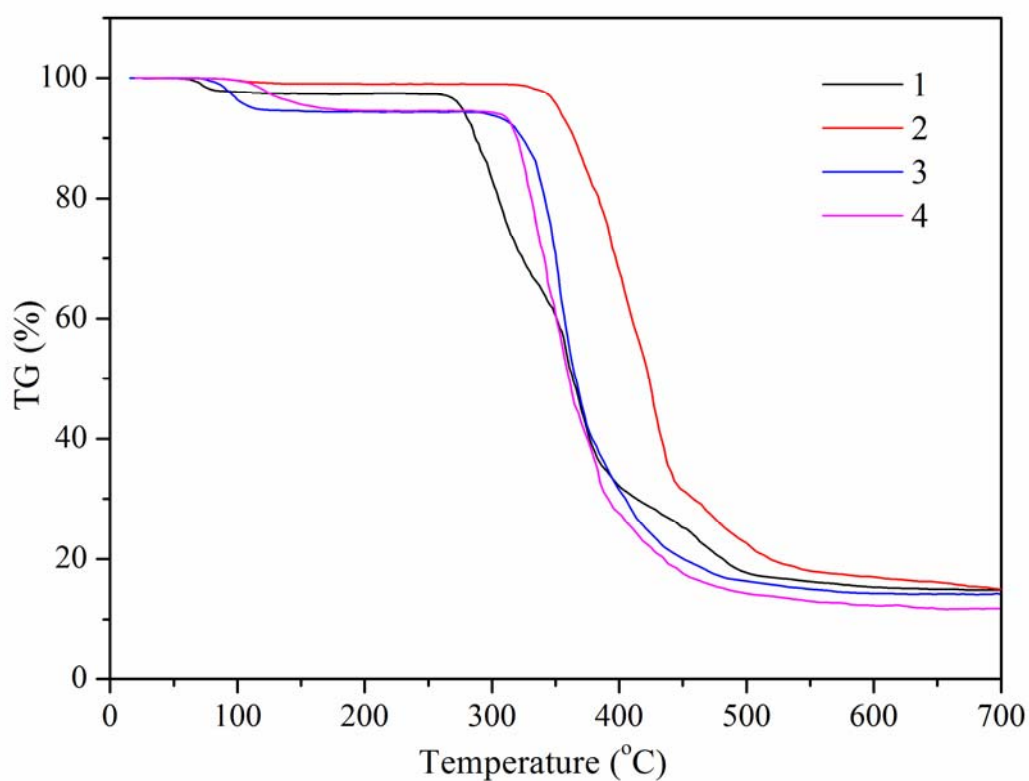

**Fig. S1.** TGA curves for complexes **1-4** under nitrogen atmosphere.

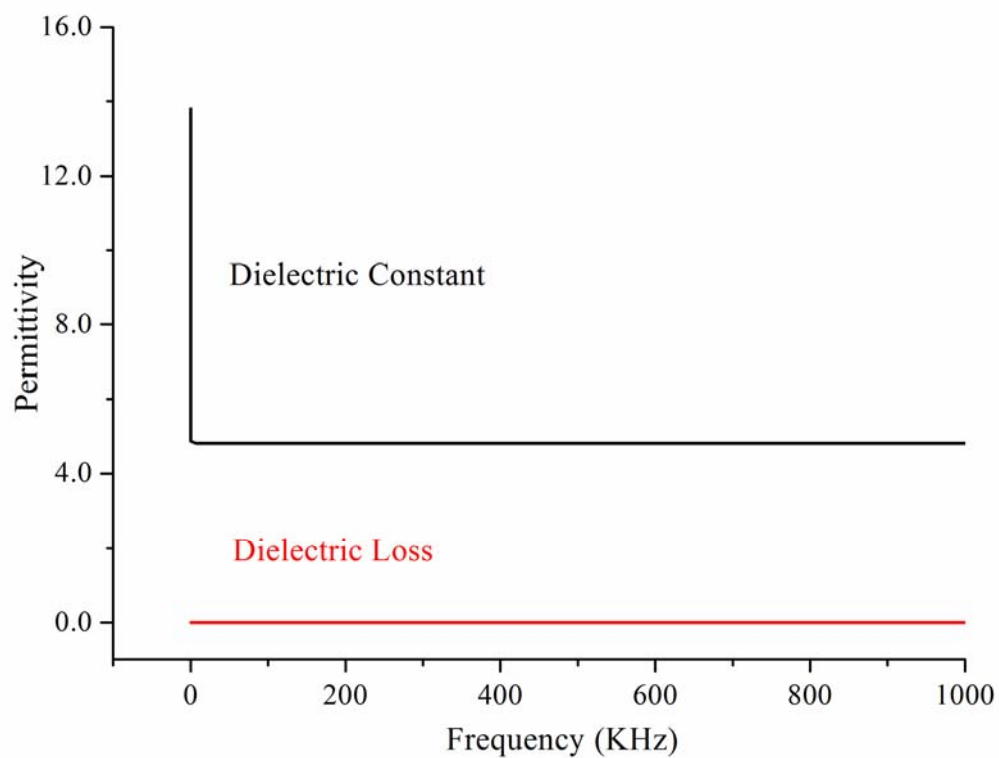

**Fig. S2** Frequency dependence of permittivity ( $\epsilon = \epsilon_1(\omega) - i\epsilon_2(\omega)$ ) of complex **1** at room temperature (20°C).
